# Supplementary material for: Extending the capabilities of field flow fractionation online with ICP-MS for the determination of particulate carbon in latex and charcoal
Source: Royal Society of Chemistry journal article supplement (doi:10.1039/c8ja00101d), 2018-01-01

## Supplementary Information

### Extending the capabilities of field flow fractionation online with ICP-MS for the determination of particulate carbon in latex and charcoal

Volker Nischwitz <sup>1\*</sup>, Nina Gottselig <sup>2</sup>, Anna Missong <sup>3</sup>, Erwin Klumpp <sup>3</sup>, Melanie Braun <sup>2</sup>

<sup>1</sup> Central Institute for Engineering, Electronics and Analytics, Analytics (ZEA-3),  
Forschungszentrum Juelich, 52425 Juelich, Germany

<sup>2</sup> Institute of Crop Science and Resource Conservation (INRES), Soil Science & Soil Ecology,  
Bonn University, 53115 Bonn, Germany

<sup>3</sup> Institute of Bio- and Geosciences, Agrosphere (IBG-3), Forschungszentrum Juelich, Juelich,  
Germany

**Figure S1** Multi-Element fractograms (Al, Fe and P) recorded by FFF-ICP-MS for the same extracts (Soil\_A\_Rep1) of soil and charcoal spiked soil (Soil\_Charcoal\_A\_Rep1) shown in Figure 3

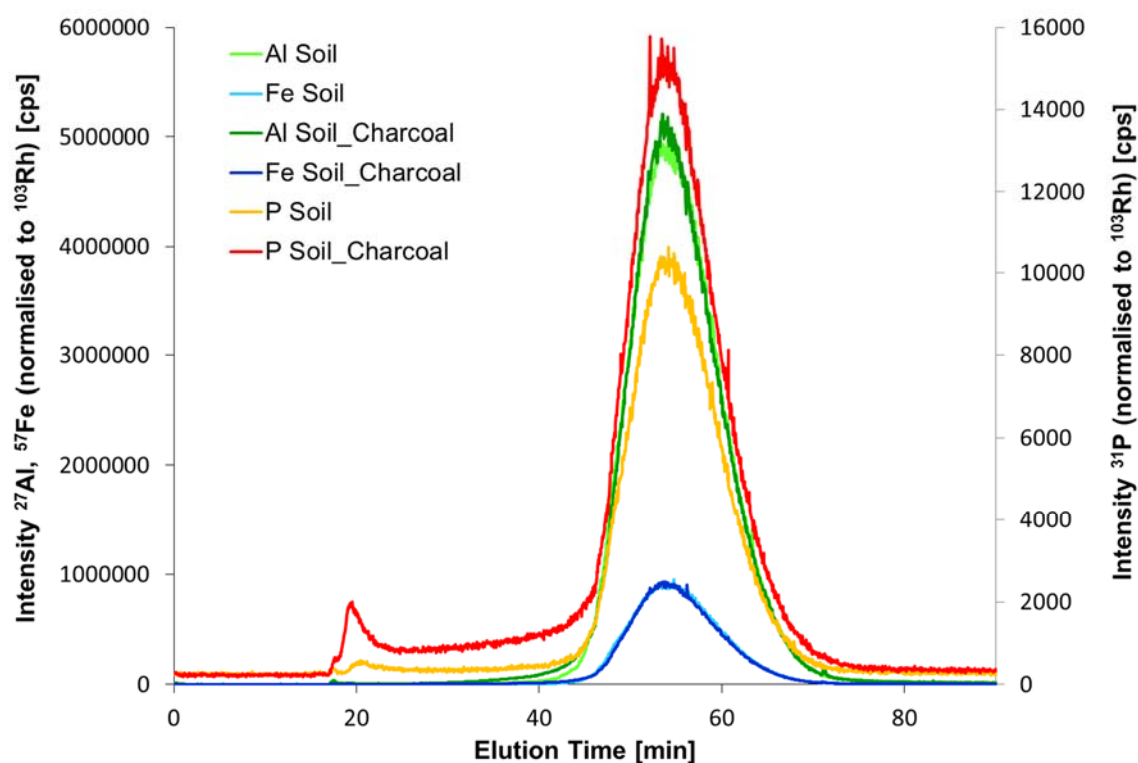

**Figure S2** Variation of sampling depth for increasing amounts of carbon introduced by flow-injection FFF online with ICP-MS into the plasma (n=1). The sample was an aqueous suspension of 100 nm latex particles at a carbon concentration of approximately 350 mg/L.

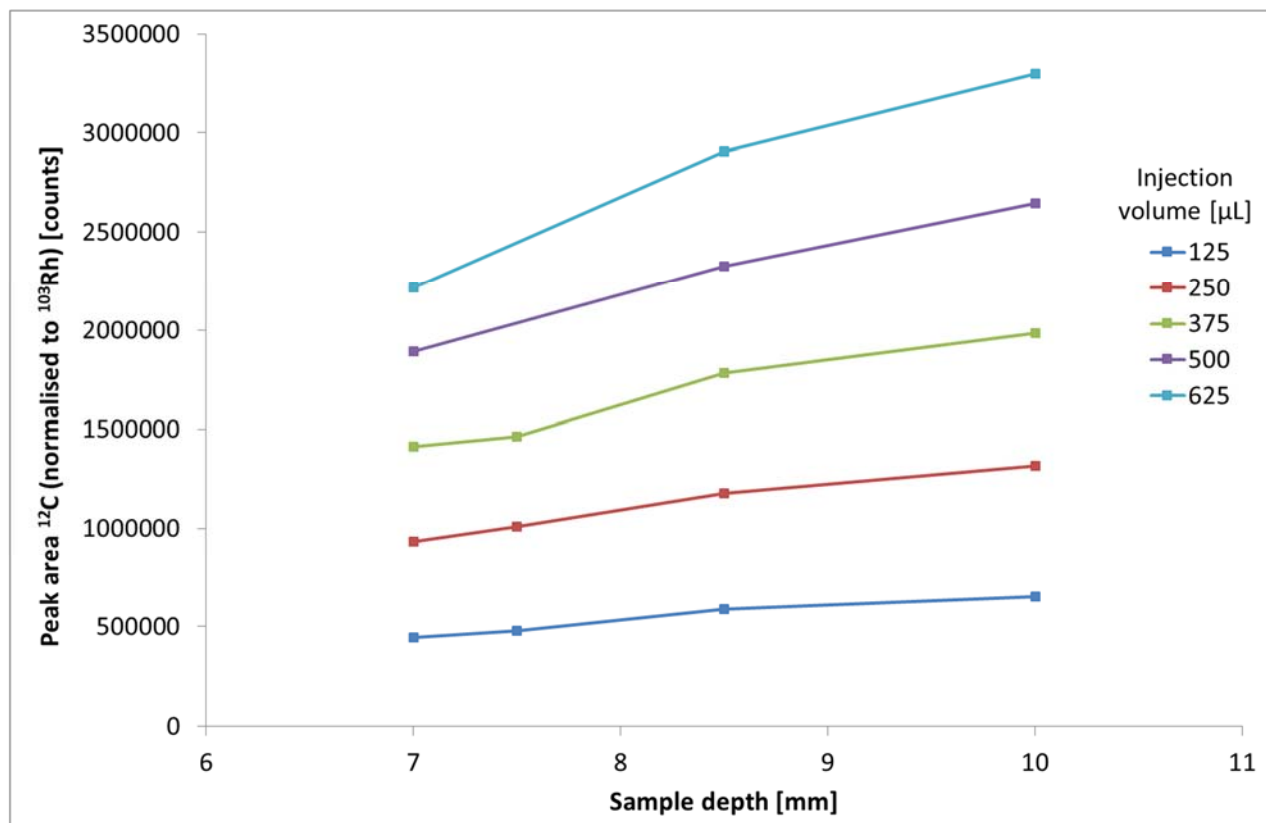

**Figure S3** Calibration at sampling depth 8.5 by variation of the injection volume of a 100 nm latex suspension (approximately 350 mg/L carbon) using flow injection FFF-ICP-MS.

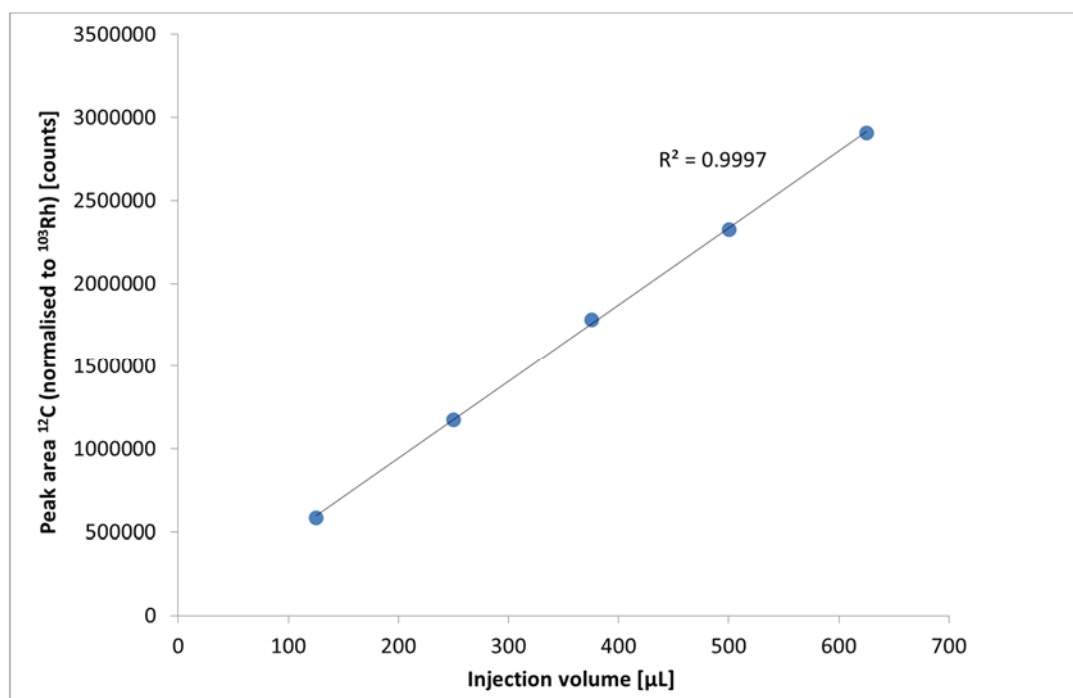

Supplement: c8ja00101d1.pdf [file c8ja00101d1.pdf]
